# Supplementary material for: Outcomes of liver transplantation for non-alcoholic steatohepatitis: A European Liver Transplant Registry study
Source: PubMed Central journal article supplement (PMC6656693; doi:10.1016/j.jhep.2019.04.011), 2019-08
Supplement: mmc1.pdf [file mmc1.pdf]

# **Outcomes of liver transplantation for non-alcoholic steatohepatitis: A European Liver Transplant Registry study**

Debashis Haldar, Barbara Kern, James Hodson, Matthew James Armstrong, Rene Adam, Gabriela Berlakovich, Josef Fritz, Benedikt Feurstein, Wolfgang Popp, Vincent Karam, Paolo Muiesan, John O’Grady, Neville Jamieson, Stephen J Wigmore, Jacques Pirenne, Seyed Ali Malek-Hosseini, Ernest Hidalgo, Yaman Tokat, Andreas Paul, Johann Pratschke, Michael Bartels, Pavel Trunecka, Utz Settmacher, Massimo Pinzani, Christophe Duvoux, Philip Noel Newsome, Stefan Schneeberger and all contributing centres ([www.eltr.org](http://www.eltr.org)) and the European Liver and Intestine Transplant Association (ELITA).

## Table of contents

|               |    |
|---------------|----|
| Fig. S1.....  | 3  |
| Fig. S2.....  | 4  |
| Fig. S3.....  | 5  |
| Fig. S4.....  | 6  |
| Fig. S5.....  | 7  |
| Table S1..... | 8  |
| Table S2..... | 9  |
| Table S3..... | 10 |
| Table S4..... | 11 |
| Table S5..... | 13 |

Table S6.....15

Table S7.....17

Table S8.....19

Table S9.....21

Table S10.....23

Table S11.....24

Table S12.....25

Table S13.....26

Table S14.....28

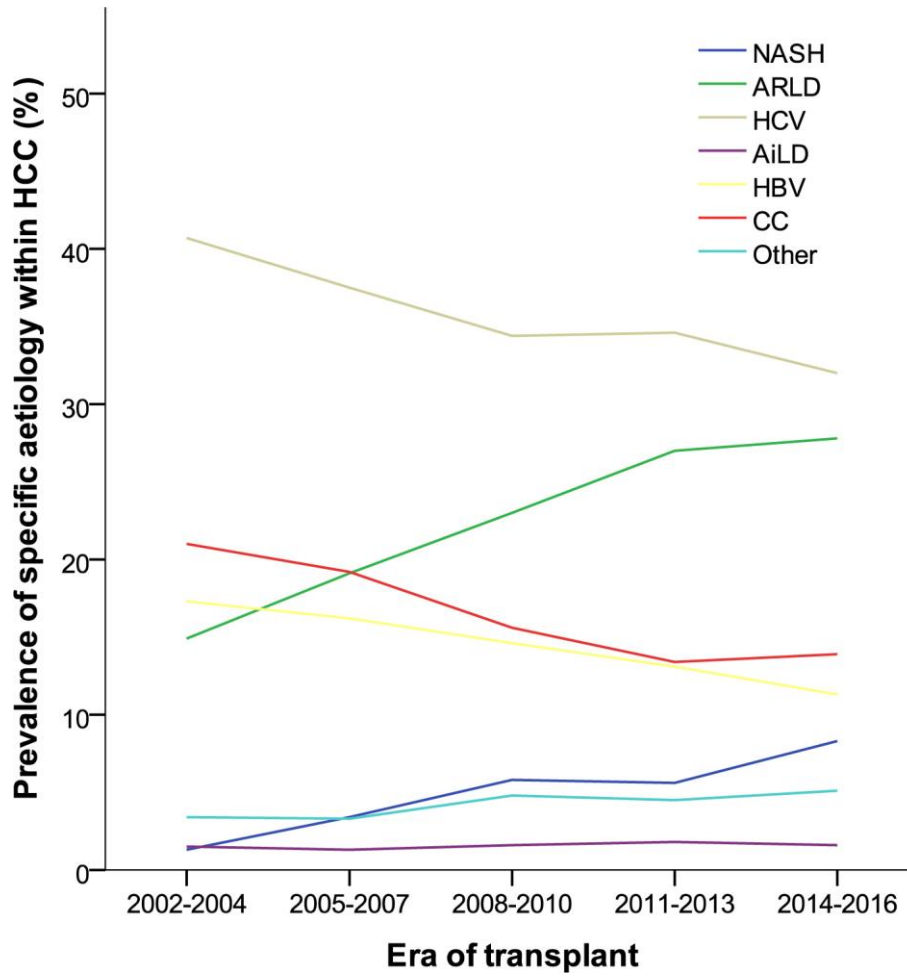

**Fig. S1. Prevalence of liver disease aetiologies in patients with HCC in different era.**

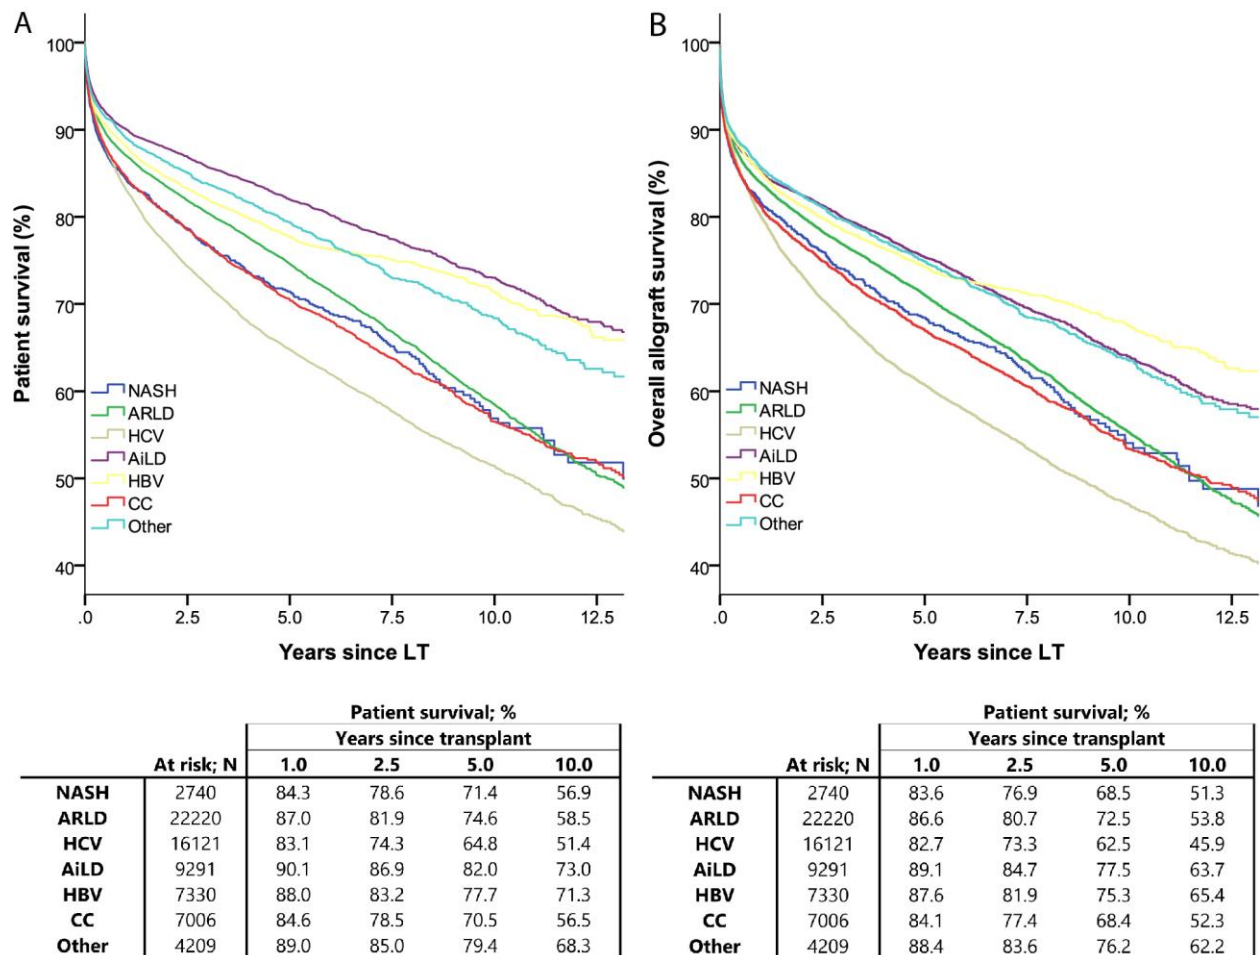

**Fig. S2. Kaplan-Meier curves of patient survival (A) and overall allograft survival (B) analysis for all patients undergoing primary LT for different indications (log-rank:  $P < 0.001$  for both).**

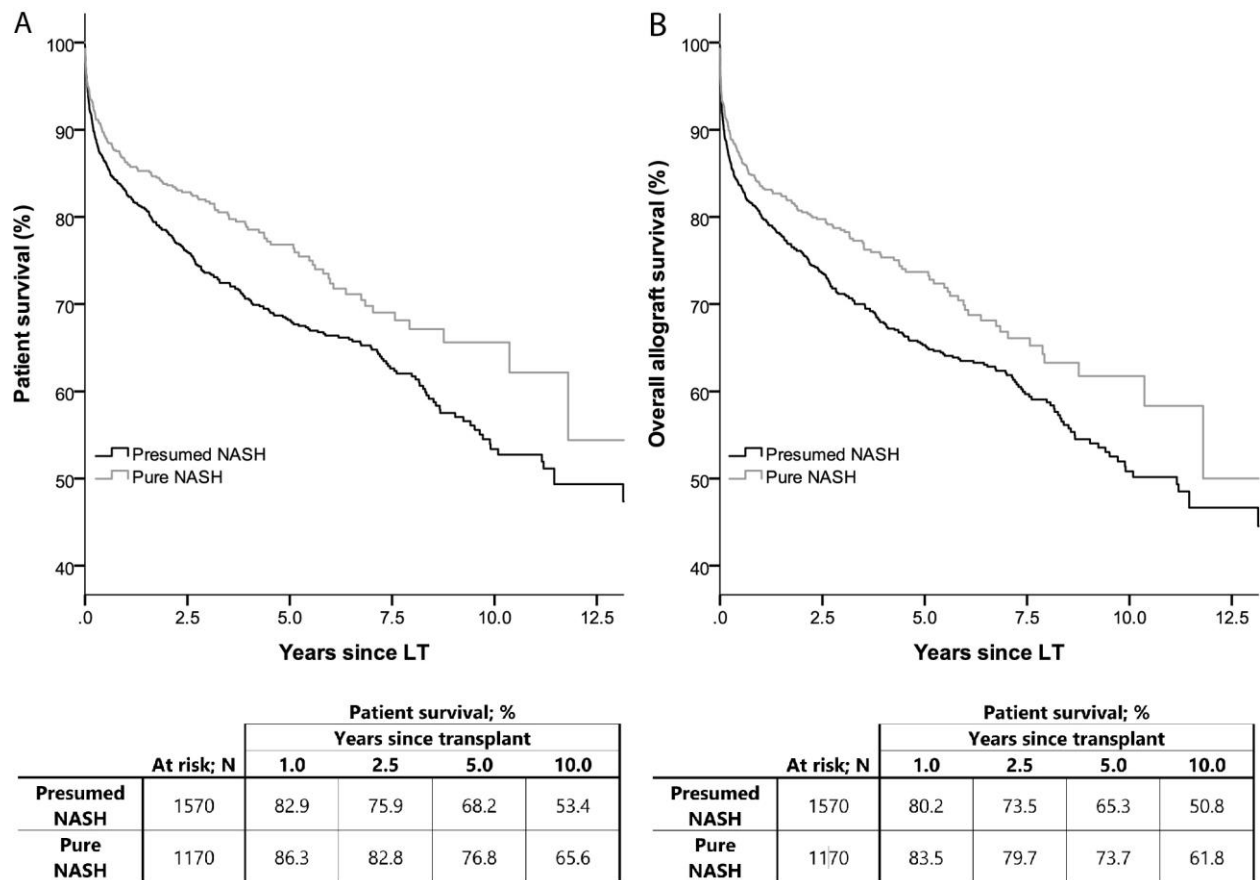

**Fig. S3. Kaplan-Meier curves of patient survival (A) and overall allograft survival (B) analysis for patients with pure NASH and presumed NASH undergoing primary LT (log-rank:  $P < 0.001$  for both).**

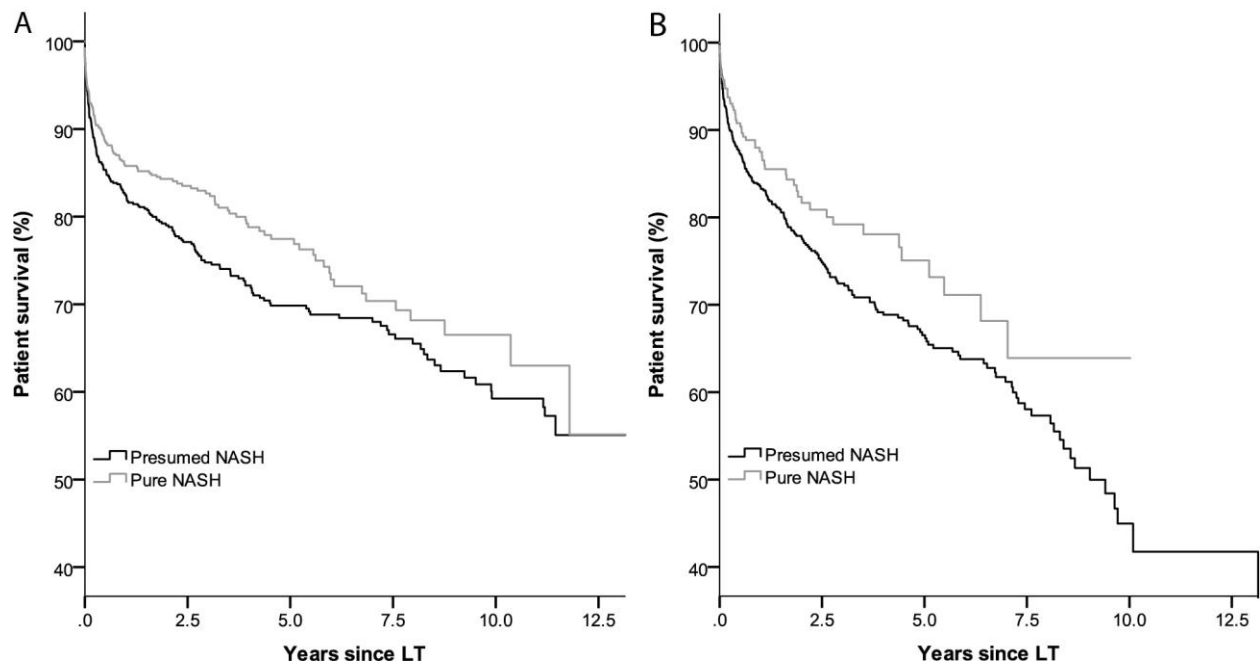

**Fig. S4. Kaplan-Meier curves of patient survival comparing those transplanted for pure and presumed NASH stratified by the absence (A) and presence (B) of HCC (A: log-rank:  $P=0.019$ ; B: log-rank  $P=0.046$ ).**

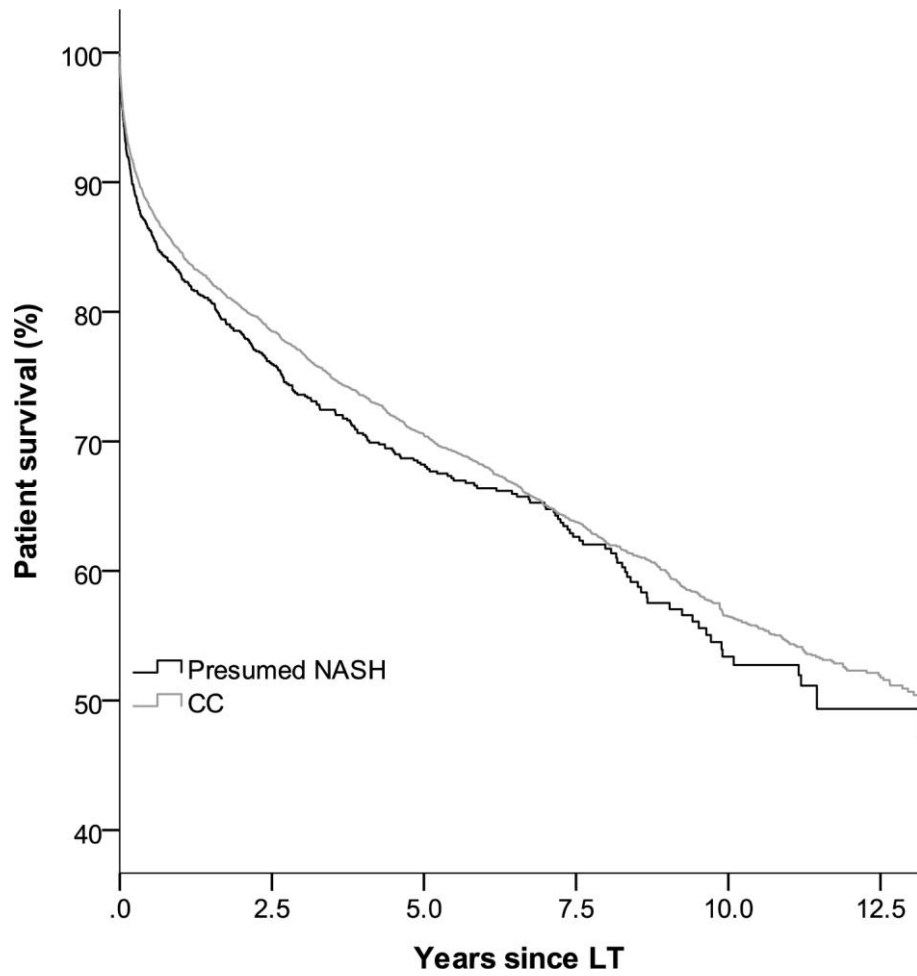

**Fig. S5. Kaplan-Meier curves of patient survival comparing those transplanted for presumed NASH and those with CC (log-rank:  $P=0.072$ ).**

|                           |                   | Year of Transplant |                |                |                |                |                |                |                |                |                |                |                |                |                |                |       |
|---------------------------|-------------------|--------------------|----------------|----------------|----------------|----------------|----------------|----------------|----------------|----------------|----------------|----------------|----------------|----------------|----------------|----------------|-------|
|                           |                   | 2002               | 2003           | 2004           | 2005           | 2006           | 2007           | 2008           | 2009           | 2010           | 2011           | 2012           | 2013           | 2014           | 2015           | 2016*          | Total |
| Indication for Transplant | <b>NASH</b>       | 45<br>(1.2)        | 53<br>(1.4)    | 44<br>(1.1)    | 72<br>(1.7)    | 106<br>(2.4)   | 132<br>(2.8)   | 175<br>(3.6)   | 178<br>(3.7)   | 205<br>(4.2)   | 219<br>(4.3)   | 232<br>(4.6)   | 274<br>(5.3)   | 331<br>(6.2)   | 343<br>(6.8)   | 332<br>(8.4)   | 2741  |
|                           | <b>ARLD</b>       | 1135<br>(30.2)     | 1103<br>(29.8) | 1246<br>(30.2) | 1257<br>(29.4) | 1297<br>(30.1) | 1507<br>(32.5) | 1540<br>(31.8) | 1620<br>(33.8) | 1611<br>(33.4) | 1721<br>(33.7) | 1713<br>(33.9) | 1727<br>(33.5) | 1717<br>(32.3) | 1756<br>(34.6) | 1276<br>(32.3) | 22226 |
|                           | <b>HCV</b>        | 994<br>(26.4)      | 1047<br>(28.2) | 1077<br>(26.1) | 1148<br>(26.8) | 1110<br>(25.8) | 1139<br>(24.5) | 1184<br>(24.4) | 1155<br>(24.1) | 1106<br>(22.9) | 1180<br>(23.1) | 1111<br>(22.0) | 1190<br>(23.1) | 1176<br>(22.1) | 977<br>(19.2)  | 533<br>(13.5)  | 16127 |
|                           | <b>AiLD</b>       | 553<br>(14.7)      | 482<br>(13.0)  | 567<br>(13.7)  | 610<br>(14.2)  | 550<br>(12.8)  | 573<br>(12.4)  | 582<br>(12.0)  | 543<br>(11.4)  | 568<br>(11.8)  | 672<br>(13.1)  | 667<br>(13.2)  | 686<br>(13.3)  | 785<br>(14.7)  | 768<br>(15.1)  | 694<br>(17.6)  | 9300  |
|                           | <b>HBV</b>        | 458<br>(12.2)      | 418<br>(11.3)  | 488<br>(11.8)  | 506<br>(11.8)  | 436<br>(10.1)  | 552<br>(11.9)  | 579<br>(12.0)  | 523<br>(10.9)  | 529<br>(10.9)  | 539<br>(10.5)  | 547<br>(10.8)  | 508<br>(9.9)   | 493<br>(9.3)   | 394<br>(7.8)   | 367<br>(9.3)   | 7337  |
|                           | <b>CC</b>         | 342<br>(9.1)       | 361<br>(9.7)   | 442<br>(10.7)  | 462<br>(10.8)  | 563<br>(13.1)  | 462<br>(10.0)  | 469<br>(9.7)   | 505<br>(10.5)  | 509<br>(10.5)  | 477<br>(9.3)   | 463<br>(9.2)   | 466<br>(9.0)   | 486<br>(9.1)   | 525<br>(10.3)  | 477<br>(12.1)  | 7009  |
|                           | <b>Other</b>      | 229<br>(6.1)       | 243<br>(6.6)   | 267<br>(6.4)   | 229<br>(5.3)   | 245<br>(5.7)   | 274<br>(5.9)   | 313<br>(6.5)   | 266<br>(5.6)   | 305<br>(6.3)   | 308<br>(6.0)   | 314<br>(6.2)   | 301<br>(5.9)   | 334<br>(6.3)   | 315<br>(6.2)   | 267<br>(6.8)   | 4210  |
|                           | <b>Total</b>      | 3756               | 3707           | 4131           | 4284           | 4307           | 4639           | 4842           | 4790           | 4833           | 5116           | 5047           | 5152           | 5322           | 5078           | 3946           | 68950 |
|                           | <b>Pure NASH</b>  | 7<br>(0.2)         | 7<br>(0.2)     | 11<br>(0.3)    | 18<br>(0.4)    | 28<br>(0.7)    | 26<br>(0.6)    | 40<br>(0.8)    | 56<br>(1.2)    | 66<br>(1.4)    | 106<br>(2.1)   | 98<br>(1.9)    | 144<br>(2.8)   | 186<br>(3.5)   | 194<br>(3.8)   | 184<br>(4.7)   | 1171  |
|                           | <b>Pres' NASH</b> | 38<br>(1.0)        | 46<br>(1.2)    | 33<br>(0.8)    | 54<br>(1.3)    | 78<br>(1.7)    | 106<br>(2.2)   | 135<br>(2.8)   | 122<br>(2.5)   | 139<br>(2.8)   | 113<br>(2.2)   | 134<br>(2.7)   | 130<br>(2.5)   | 145<br>(2.7)   | 149<br>(3.0)   | 148<br>(3.7)   | 1570  |

**Table S1. Trends of annual primary LTs performed for different indications in the ELTR region.** Both absolute numbers and percentages (in brackets) are reported. Additional figures for patients classified as “pure NASH” (patients coded as NASH in the ELTR) and “pres’ NASH” (presumed NASH = patients coded as cryptogenic cirrhosis with a BMI > 30kg.m<sup>-2</sup> in the ELTR) are also provided. \*Data from 2016 is incomplete, as not all centres had entered data on to ELTR at the time of collection



|                                                    | Odds ratio of receiving a DCD organ |                  |
|----------------------------------------------------|-------------------------------------|------------------|
|                                                    | OR (95% CI)                         | <i>P</i>         |
| <b>NASH</b>                                        | 1.53 (0.21-11.11)                   | 0.677            |
| <b>Era of transplant</b>                           |                                     | <b>&lt;0.001</b> |
| 2002-2004                                          | 1.00                                |                  |
| 2005-2007                                          | 2.12 (1.54-2.92)                    | <b>&lt;0.001</b> |
| 2008-2010                                          | 5.10 (3.81-6.83)                    | <b>&lt;0.001</b> |
| 2011-2013                                          | 7.60 (5.72-10.10)                   | <b>&lt;0.001</b> |
| 2014-2016                                          | 12.18 (9.20-16.12)                  | <b>&lt;0.001</b> |
| <b>Era of transplant * NASH (interaction term)</b> |                                     | 0.765            |
| 2002-2004*NASH                                     | 1.00                                |                  |
| 2005-2007*NASH                                     | 1.99 (0.24-16.25)                   | 0.521            |
| 2008-2010*NASH                                     | 1.19 (0.57-9.07)                    | 0.867            |
| 2011-2013*NASH                                     | 1.23 (0.17-9.19)                    | 0.839            |
| 2014-2016*NASH                                     | 1.32 (0.18-9.71)                    | 0.787            |

**Table S2. Interaction analysis between NASH and era of transplant on the rate of DCD transplants.** Binary logistic model: the interaction term (Era of transplant\*NASH) tests whether the difference in the DCD rate between NASH and non-NASH varies with time. Bold *P*-values are significant at  $P<0.05$

|                                            | Recipients without HCC |                     |                  | Recipients with HCC |                     |                  |
|--------------------------------------------|------------------------|---------------------|------------------|---------------------|---------------------|------------------|
|                                            | NASH<br>N=1667         | Non-NASH<br>N=47087 | <i>P</i>         | NASH<br>N=1073      | Non-NASH<br>N=19122 | <i>P</i>         |
| <b>RECIPIENT CHARACTERISTICS</b>           |                        |                     |                  |                     |                     |                  |
| Age; years; <i>median (IQR)</i>            | 58 (51-63)             | 53 (46-59)          | <b>&lt;0.001</b> | 61 (57-65)          | 58 (53-63)          | <b>&lt;0.001</b> |
| Sex: male; %                               | 64.4                   | 67.3                | <b>0.011</b>     | 81.6                | 83.8                | 0.061            |
| Blood group; %                             |                        |                     | 0.875            |                     |                     | 0.076            |
| A                                          | 43.8                   | 43.3                |                  | 43.2                | 44.3                |                  |
| AB                                         | 5.8                    | 5.8                 |                  | 5.9                 | 5.1                 |                  |
| B                                          | 12.4                   | 13.1                |                  | 14.0                | 11.7                |                  |
| O                                          | 38.0                   | 37.8                |                  | 37.0                | 38.9                |                  |
| BMI; kg.m <sup>-2</sup> ; <i>mean (SD)</i> | 32.6 (4.91)            | 25.6 (4.57)         | <b>&lt;0.001</b> | 32.6 (4.98)         | 26.4 (4.05)         | <b>&lt;0.001</b> |
| MELD; <i>median (IQR)</i>                  | 18 (14-23)             | 18 (13-26)          | <b>0.019</b>     | 13 (9-17)           | 12 (9-16)           | <b>0.016</b>     |
| <b>DONOR CHARACTERISTICS</b>               |                        |                     |                  |                     |                     |                  |
| Age; <i>median (IQR)</i>                   | 51 (38-62)             | 50 (36-63)          | 0.522            | 55 (41-68)          | 55 (44-67)          | 0.553            |
| Sex: male; %                               | 61.1                   | 57.1                | <b>0.001</b>     | 64.2                | 58.7                | <b>&lt;0.001</b> |
| Blood group; %                             |                        |                     | 0.170            |                     |                     | 0.229            |
| A                                          | 41.9                   | 42.4                |                  | 41.7                | 43.3                |                  |
| AB                                         | 4.4                    | 4.3                 |                  | 4.7                 | 3.9                 |                  |
| B                                          | 10.4                   | 12.0                |                  | 12.5                | 11.0                |                  |
| O                                          | 43.4                   | 41.3                |                  | 41.1                | 41.7                |                  |
| BMI; kg.m <sup>-2</sup> ; <i>mean (SD)</i> | 26.8 (4.70)            | 25.4 (4.26)         | <b>&lt;0.001</b> | 27.1 (4.96)         | 25.7 (4.38)         | <b>&lt;0.001</b> |
| Type of donor; %                           |                        |                     | <b>&lt;0.001</b> |                     |                     | <b>&lt;0.001</b> |
| DBD                                        | 82.4                   | 90.4                |                  | 88.0                | 90.3                |                  |
| DCD                                        | 6.1                    | 2.5                 |                  | 7.3                 | 2.8                 |                  |
| Domino                                     | 0.5                    | 0.7                 |                  | 1.2                 | 1.6                 |                  |
| Living                                     | 10.9                   | 6.4                 |                  | 3.5                 | 5.2                 |                  |

**Table S3. Donor and recipient factors in patients transplanted for NASH and non-NASH indications described by the absence or presence of concomitant HCC. Bold**

*P*-values are significant at  $P<0.05$

|                                  | Univariable               | Multivariable             |
|----------------------------------|---------------------------|---------------------------|
|                                  | HR (95% CI)               | HR (95% CI)               |
| <b>RECIPIENT CHARACTERISTICS</b> |                           |                           |
| <b>NASH (vs non-NASH)</b>        | 1.09 (0.97-1.23)          | 1.10 (0.97-1.24)          |
| <b>Cirrhosis aetiology</b>       | <b>Overall**</b>          | n/a                       |
| NASH                             | 1.00                      |                           |
| ARLD                             | <b>0.87 (0.76-0.99)*</b>  |                           |
| HCV                              | 1.07 (0.94-1.21)          |                           |
| AiLD                             | <b>0.76 (0.58-0.98)*</b>  |                           |
| HBV                              | <b>0.68 (0.59-0.79)**</b> |                           |
| CC                               | 0.93 (0.81-1.06)          |                           |
| Other                            | <b>0.74 (0.62-0.88)*</b>  |                           |
| <b>Age (years)</b>               | <b>Overall**</b>          | <b>Overall**</b>          |
| </=45                            | 1.00                      | 1.00                      |
| 46-55                            | <b>1.14 (1.01-1.29)*</b>  | <b>1.18 (1.05-1.34)*</b>  |
| 56-60                            | <b>1.27 (1.13-1.44)**</b> | <b>1.33 (1.18-1.51)**</b> |
| 61-65                            | <b>1.42 (1.26-1.60)*</b>  | <b>1.51 (1.33-1.70)**</b> |
| >65                              | <b>1.52 (1.34-1.73)*</b>  | <b>1.67 (1.46-1.91)**</b> |
| <b>Sex: male</b>                 | 0.97 (0.90-1.04)          | not in final model        |
| <b>MELD</b>                      | <b>Overall**</b>          | <b>Overall**</b>          |
| ≤11                              | 1.00                      | 1.00                      |
| >11, ≤14                         | 0.93 (0.84-1.02)          | 0.94 (0.85-1.03)          |
| >14, ≤18                         | 0.94 (0.85-1.03)          | 0.93 (0.85-1.03)          |
| >18, ≤23                         | 1.03 (0.92-1.16)          | 1.04 (0.92-1.17)          |
| >23                              | <b>1.40 (1.24-1.59)**</b> | <b>1.41 (1.25-1.60)**</b> |
| Missing value                    | <b>1.17 (1.09-1.25)**</b> | <b>1.24 (1.14-1.36)**</b> |
| <b>Blood group</b>               | <b>Overall</b>            | not in final model        |
| A                                | 1.00                      |                           |
| AB                               | 0.94 (0.83-1.06)          |                           |
| B                                | 0.95 (0.97-1.04)          |                           |
| O                                | 1.02 (0.96-1.08)          |                           |
| <b>BMI (kg.m<sup>-2</sup>)</b>   | <b>Overall</b>            | not in final model        |
| ≤18.5                            | 1.11 (0.81-1.51)          |                           |
| >18.5, ≤25.0                     | 1.00                      |                           |
| >25.0, ≤30.0                     | 0.97 (0.89-1.05)          |                           |
| >30.0, ≤35.0                     | 1.02 (0.93-1.14)          |                           |
| >35.0, ≤40.0                     | 0.90 (0.74-1.10)          |                           |
| >40.0                            | 1.13 (0.77-1.67)          |                           |
| Missing value                    | 1.01 (0.94-1.09)          |                           |
| <b>DONOR CHARACTERISTICS</b>     |                           |                           |
| <b>Age (years)</b>               | <b>Overall**</b>          | <b>Overall**</b>          |
| </=34                            | 1.00                      | 1.00                      |
| 35-47                            | 1.03 (0.94-1.13)          | 1.03 (0.94-1.13)          |
| 48-57                            | 1.09 (1.00-1.19)          | <b>1.10 (1.00-1.20)*</b>  |
| 58-67                            | <b>1.17 (1.07-1.27)**</b> | <b>1.18 (1.07-1.29)*</b>  |

|                                    |                           |                           |
|------------------------------------|---------------------------|---------------------------|
| >68                                | <b>1.19 (1.09-1.29)**</b> | <b>1.19 (1.09-1.30)**</b> |
| <b>Sex: male</b>                   | 0.95 (0.90-1.00)          | not in final model        |
| <b>Blood group</b>                 | <b>Overall</b>            | not in final model        |
| A                                  | 1.00                      |                           |
| AB                                 | 0.90 (0.78-1.04)          |                           |
| B                                  | 0.96 (0.88-1.05)          |                           |
| O                                  | 1.02 (0.97-1.08)          |                           |
| <b>BMI (kg.m<sup>-2</sup>)</b>     | <b>Overall</b>            | <b>Overall**</b>          |
| ≤18.5                              | 1.01 (0.82-1.26)          | 0.99 (0.79-1.24)          |
| >18.5, ≤25.0                       | 1.00                      | 1.00                      |
| >25.0, ≤30.0                       | 1.07 (0.99-1.14)          | 1.06 (0.99-1.14)          |
| >30.0, ≤35.0                       | <b>1.13 (1.01-1.26)*</b>  | <b>1.13 (1.01-1.27)*</b>  |
| >35.0, ≤40.0                       | <b>1.23 (1.00-1.51)*</b>  | <b>1.28 (1.04-1.58)*</b>  |
| >40.0                              | 1.05 (0.75-1.47)          | 1.11 (0.79-1.57)          |
| Missing value                      | 1.02 (0.95-1.09)          | 0.94 (0.87-1.01)          |
| <b>Type of donor</b>               | <b>Overall**</b>          | <b>Overall**</b>          |
| DBD                                | 1.00                      | 1.00                      |
| DCD                                | 1.01 (0.85-1.20)          | 1.09 (0.91-1.29)          |
| Domino                             | 1.08 (0.89-1.31)          | 1.09 (0.90-1.32)          |
| Living                             | <b>1.25 (1.11-1.40)**</b> | <b>1.45 (1.28-1.64)**</b> |
| <b>OTHER SIGNIFICANT VARIABLES</b> |                           |                           |
| <b>Re-transplant</b>               | <b>1.78 (1.63-1.95)**</b> | <b>1.81 (1.65-1.98)**</b> |
| <b>Era of transplant</b>           | <b>Overall**</b>          | <b>Overall*</b>           |
| 2002-2004                          | 1.00                      | 1.00                      |
| 2005-2007                          | 1.00 (0.93-1.08)          | 1.05 (0.96-1.13)          |
| 2008-2010                          | 0.95 (0.87-1.03)          | 1.02 (0.93-1.11)          |
| 2011-2013                          | <b>0.85 (0.78-0.93)**</b> | 0.93 (0.84-1.04)          |
| 2014-2016                          | <b>0.77 (0.68-0.86)**</b> | <b>0.84 (0.73-0.95)*</b>  |

**Table S4. Recipient and donor factors that influence patient survival in transplant recipients with HCC.** The final multivariable models were based on 19,514 patients.

\* $P < 0.05$ ; \*\* $P < 0.001$

|                                  | Patient survival |                  |                    |                  | Overall allograft survival |                  |                    |                  |
|----------------------------------|------------------|------------------|--------------------|------------------|----------------------------|------------------|--------------------|------------------|
|                                  | Univariable      |                  | Multivariable      |                  | Univariable                |                  | Multivariable      |                  |
|                                  | HR (95% CI)      | P                | HR (95% CI)        | P                | HR (95% CI)                | P                | HR (95% CI)        | P                |
| <b>RECIPIENT CHARACTERISTICS</b> |                  |                  |                    |                  |                            |                  |                    |                  |
| <b>NASH (vs non-NASH)</b>        | 1.12 (1.04-1.22) | <b>0.005</b>     | 1.02 (0.93-1.11)   | 0.713            | 1.06 (0.98-1.14)           | 0.132            | 0.99 (0.91-1.08)   | 0.815            |
| <b>Aetiology of cirrhosis</b>    |                  | <b>&lt;0.001</b> |                    |                  |                            | <b>&lt;0.001</b> |                    |                  |
| NASH                             | 1.00             |                  |                    |                  | 1.00                       |                  |                    |                  |
| ARLD                             | 0.89 (0.82-0.97) | <b>0.006</b>     |                    |                  | 0.92 (0.85-0.99)           | <b>0.034</b>     |                    |                  |
| HCV                              | 1.19 (1.09-1.29) | <b>&lt;0.001</b> | n/a                |                  | 1.21 (1.12-1.31)           | <b>&lt;0.001</b> | n/a                |                  |
| AiLD                             | 0.58 (0.53-0.63) | <b>&lt;0.001</b> |                    |                  | 0.75 (0.69-0.81)           | <b>&lt;0.001</b> |                    |                  |
| HBV                              | 0.68 (0.62-0.75) | <b>&lt;0.001</b> |                    |                  | 0.73 (0.67-0.80)           | <b>&lt;0.001</b> |                    |                  |
| CC                               | 0.99 (0.91-1.09) | 0.890            |                    |                  | 1.02 (0.93-1.11)           | 0.732            |                    |                  |
| Other                            | 0.68 (0.61-0.76) | <b>&lt;0.001</b> |                    |                  | 0.76 (0.69-0.83)           | <b>&lt;0.001</b> |                    |                  |
| <b>Age (years)</b>               |                  | <b>&lt;0.001</b> |                    | <b>&lt;0.001</b> |                            | <b>&lt;0.001</b> |                    | <b>&lt;0.001</b> |
| <=45                             | 1.00             |                  | 1.00               |                  | 1.00                       |                  | 1.00               |                  |
| 46-55                            | 1.26 (1.20-1.32) | <b>&lt;0.001</b> | 1.25 (1.19-1.32)   | <b>&lt;0.001</b> | 1.13 (1.08-1.17)           | <b>&lt;0.001</b> | 1.08 (1.04-1.13)   | <b>&lt;0.001</b> |
| 56-60                            | 1.48 (1.41-1.56) | <b>&lt;0.001</b> | 1.48 (1.41-1.56)   | <b>&lt;0.001</b> | 1.24 (1.19-1.30)           | <b>&lt;0.001</b> | 1.18 (1.13-1.24)   | <b>&lt;0.001</b> |
| 61-65                            | 1.73 (1.65-1.82) | <b>&lt;0.001</b> | 1.72 (1.63-1.82)   | <b>&lt;0.001</b> | 1.39 (1.33-1.46)           | <b>&lt;0.001</b> | 1.31 (1.25-1.37)   | <b>&lt;0.001</b> |
| >65                              | 1.90 (1.78-2.01) | <b>&lt;0.001</b> | 1.94 (1.82-2.07)   | <b>&lt;0.001</b> | 1.49 (1.41-1.58)           | <b>&lt;0.001</b> | 1.42 (1.34-1.51)   | <b>&lt;0.001</b> |
| <b>Sex: male</b>                 | 1.12 (1.08-1.16) | <b>&lt;0.001</b> | 1.08 (1.04-1.12)   | <b>&lt;0.001</b> | 1.09 (1.06-1.13)           | <b>&lt;0.001</b> | 1.07 (1.03-1.10)   | <b>&lt;0.001</b> |
| <b>MELD</b>                      |                  | <b>&lt;0.001</b> |                    | <b>&lt;0.001</b> |                            | <b>&lt;0.001</b> |                    | <b>&lt;0.001</b> |
| <=11                             | 1.00             |                  | 1.00               |                  | 1.00                       |                  | 1.00               |                  |
| >11, <=14                        | 0.90 (0.85-0.96) | <b>0.002</b>     | 0.96 (0.90-1.03)   | 0.230            | 0.91 (0.86-0.97)           | <b>0.003</b>     | 0.95 (0.90-1.01)   | 0.091            |
| >14, <=18                        | 0.90 (0.85-0.96) | <b>&lt;0.001</b> | 1.00 (0.94-1.06)   | 0.913            | 0.91 (0.86-0.96)           | <b>&lt;0.001</b> | 0.97 (0.92-1.03)   | 0.270            |
| >18, <=23                        | 0.91 (0.86-0.97) | <b>0.005</b>     | 1.05 (1.05-1.12)   | 0.164            | 0.90 (0.85-0.95)           | <b>&lt;0.001</b> | 0.98 (0.92-1.04)   | 0.438            |
| >23                              | 1.30 (1.23-1.38) | <b>&lt;0.001</b> | 1.52 (1.52-1.62)   | <b>&lt;0.001</b> | 1.24 (1.17-1.30)           | <b>&lt;0.001</b> | 1.36 (1.29-1.44)   | <b>&lt;0.001</b> |
| Missing value                    | 1.08 (1.03-1.13) | <b>0.002</b>     | 1.24 (1.24-1.32)   | <b>&lt;0.001</b> | 1.06 (1.01-1.11)           | <b>0.010</b>     | 1.25 (1.18-1.32)   | <b>&lt;0.001</b> |
| <b>Blood group</b>               |                  | 0.393            |                    |                  |                            | 0.763            |                    | <b>0.012</b>     |
| A                                | 1.00             |                  |                    |                  | 1.00                       |                  | 1.00               |                  |
| AB                               | 0.96 (0.90-1.03) | 0.246            | not in final model |                  | 0.97 (0.91-1.04)           | 0.385            | 1.18 (1.05-1.33)   | <b>0.008</b>     |
| B                                | 0.98 (0.93-1.02) | 0.304            |                    |                  | 0.98 (0.94-1.03)           | 0.480            | 1.07 (0.95-1.22)   | 0.262            |
| O                                | 1.01 (0.97-1.04) | 0.705            |                    |                  | 1.00 (0.97-1.03)           | 0.905            | 0.96 (0.88-1.06)   | 0.417            |
| <b>BMI (kg.m<sup>2</sup>)</b>    |                  | <b>0.002</b>     |                    | <b>&lt;0.001</b> |                            | <b>0.005</b>     |                    | <b>&lt;0.001</b> |
| <=18.5                           | 1.15 (1.03-1.29) | <b>0.017</b>     | 1.30 (1.16-1.47)   | <b>&lt;0.001</b> | 1.17 (1.05-1.30)           | <b>0.005</b>     | 1.29 (1.15-1.44)   | <b>&lt;0.001</b> |
| >18.5, <=25.0                    | 1.00             |                  | 1.00               |                  | 1.00                       |                  | 1.00               |                  |
| >25.0, <=30.0                    | 1.01 (0.97-1.06) | 0.608            | 0.95 (0.91-0.99)   | <b>0.023</b>     | 0.98 (0.94-1.02)           | 0.359            | 0.93 (0.89-0.97)   | <b>0.001</b>     |
| >30.0, <=35.0                    | 1.09 (1.03-1.15) | <b>0.003</b>     | 1.02 (0.96-1.08)   | 0.582            | 1.03 (0.98-1.09)           | 0.232            | 0.99 (0.93-1.04)   | 0.601            |
| >35.0, <=40.0                    | 1.04 (0.94-1.16) | 0.460            | 0.99 (0.89-1.11)   | 0.894            | 0.96 (0.87-1.06)           | 0.417            | 0.93 (0.84-1.03)   | 0.137            |
| >40.0                            | 1.30 (1.08-1.57) | <b>0.005</b>     | 1.26 (1.06-1.55)   | <b>0.010</b>     | 1.21 (1.01-1.44)           | <b>0.038</b>     | 1.19 (1.00-1.42)   | 0.056            |
| Missing value                    | 1.04 (1.00-1.08) | 0.068            | 1.00 (0.94-1.05)   | 0.889            | 0.99 (0.95-1.02)           | 0.410            | 0.94 (0.89-0.99)   | <b>0.021</b>     |
| <b>HCC</b>                       | 1.25 (1.21-1.29) | <b>&lt;0.001</b> | 1.18 (1.14-1.22)   | <b>&lt;0.001</b> | 1.17 (1.14-1.21)           | <b>&lt;0.001</b> | 1.13 (1.09-1.17)   | <b>&lt;0.001</b> |
| <b>DONOR CHARACTERISTICS</b>     |                  |                  |                    |                  |                            |                  |                    |                  |
| <b>Age (years)</b>               |                  | <b>&lt;0.001</b> |                    | <b>&lt;0.001</b> |                            | <b>&lt;0.001</b> |                    | <b>&lt;0.001</b> |
| <=34                             | 1.00             |                  | 1.00               |                  | 1.00                       |                  | 1.00               |                  |
| 35-47                            | 1.15 (1.10-1.21) | <b>&lt;0.001</b> | 1.12 (1.07-1.18)   | <b>&lt;0.001</b> | 1.16 (1.11-1.22)           | <b>&lt;0.001</b> | 1.14 (1.09-1.20)   | <b>&lt;0.001</b> |
| 48-57                            | 1.24 (1.19-1.30) | <b>&lt;0.001</b> | 1.21 (1.15-1.27)   | <b>&lt;0.001</b> | 1.26 (1.21-1.32)           | <b>&lt;0.001</b> | 1.26 (1.20-1.32)   | <b>&lt;0.001</b> |
| 58-67                            | 1.39 (1.32-1.45) | <b>&lt;0.001</b> | 1.32 (1.26-1.39)   | <b>&lt;0.001</b> | 1.40 (1.34-1.47)           | <b>&lt;0.001</b> | 1.39 (1.33-1.46)   | <b>&lt;0.001</b> |
| >68                              | 1.51 (1.44-1.58) | <b>&lt;0.001</b> | 1.40 (1.33-1.48)   | <b>&lt;0.001</b> | 1.54 (1.47-1.61)           | <b>&lt;0.001</b> | 1.53 (1.46-1.60)   | <b>&lt;0.001</b> |
| <b>Sex: male</b>                 | 0.98 (0.95-1.01) | 0.221            | not in final model |                  | 0.97 (0.94-0.99)           | <b>0.031</b>     | not in final model |                  |
| <b>Blood group</b>               |                  | 0.314            |                    |                  |                            | <b>0.027</b>     |                    | <b>0.010</b>     |
| A                                | 1.00             |                  |                    |                  | 1.00                       |                  | 1.00               |                  |
| AB                               | 0.91 (0.84-0.98) | <b>0.014</b>     | not in final model |                  | 0.91 (0.85-0.98)           | <b>0.017</b>     | 0.82 (0.72-0.95)   | <b>0.006</b>     |
| B                                | 0.96 (0.91-1.01) | 0.091            |                    |                  | 0.97 (0.92-1.01)           | 0.149            | 0.93 (0.81-1.05)   | 0.238            |
| O                                | 1.02 (0.99-1.05) | 0.272            |                    |                  | 1.01 (0.98-1.04)           | 0.590            | 1.04 (0.95-1.14)   | 0.421            |
| <b>BMI (kg.m<sup>2</sup>)</b>    |                  | <b>&lt;0.001</b> |                    | <b>&lt;0.001</b> |                            | <b>&lt;0.001</b> |                    | <b>&lt;0.001</b> |

|                              |                  |                  |                  |                  |                  |                  |                  |                  |
|------------------------------|------------------|------------------|------------------|------------------|------------------|------------------|------------------|------------------|
| ≤18.5                        | 0.94 (0.84-1.06) | 0.317            | 0.92 (0.82-1.06) | 0.263            | 0.97 (0.87-1.08) | 0.566            | 0.97 (0.86-1.09) | 0.559            |
| >18.5, ≤25.0                 | 1.00             |                  | 1.00             |                  | 1.00             |                  | 1.00             |                  |
| >25.0, ≤30.0                 | 1.09 (1.05-1.13) | <b>&lt;0.001</b> | 1.03 (0.99-1.08) | 0.114            | 1.11 (1.11-1.07) | <b>&lt;0.001</b> | 1.06 (1.02-1.10) | <b>0.004</b>     |
| >30.0, ≤35.0                 | 1.11 (1.04-1.18) | <b>0.001</b>     | 1.05 (0.99-1.13) | 0.111            | 1.11 (1.04-1.18) | <b>0.001</b>     | 1.06 (1.00-1.13) | <b>0.044</b>     |
| >35.0, ≤40.0                 | 1.15 (1.02-1.30) | <b>0.022</b>     | 1.10 (0.98-1.25) | 0.106            | 1.12 (1.00-1.26) | <b>0.049</b>     | 1.10 (0.98-1.23) | 0.126            |
| >40.0                        | 0.95 (0.77-1.16) | 0.616            | 0.92 (0.76-1.14) | 0.475            | 0.94 (0.78-1.14) | 0.530            | 0.93 (0.77-1.13) | 0.467            |
| Missing value                | 0.96 (0.93-0.99) | <b>0.037</b>     | 0.89 (0.85-0.94) | <b>&lt;0.001</b> | 0.94 (0.91-0.98) | <b>0.001</b>     | 0.87 (0.83-0.91) | <b>&lt;0.001</b> |
| <b>Type of donor</b>         |                  | <b>&lt;0.001</b> |                  | <b>&lt;0.001</b> |                  | <b>&lt;0.001</b> |                  | <b>&lt;0.001</b> |
| DBD                          | 1.00             |                  | 1.00             |                  | 1.00             |                  | 1.00             |                  |
| DCD                          | 0.80 (0.71-0.89) | <b>&lt;0.001</b> | 0.85 (0.76-0.96) | <b>0.006</b>     | 0.98 (0.89-1.08) | 0.719            | 1.07 (0.97-1.18) | 0.191            |
| Domino                       | 1.19 (1.05-1.36) | <b>0.009</b>     | 1.14 (1.00-1.31) | 0.052            | 1.20 (1.06-1.36) | <b>0.005</b>     | 1.24 (1.09-1.40) | <b>0.001</b>     |
| Living                       | 1.17 (1.10-1.25) | <b>&lt;0.001</b> | 1.47 (1.37-1.57) | <b>&lt;0.001</b> | 1.12 (1.06-1.19) | <b>&lt;0.001</b> | 1.36 (1.27-1.46) | <b>&lt;0.001</b> |
| <b>OTHER CHARACTERISTICS</b> |                  |                  |                  |                  |                  |                  |                  |                  |
| <b>Re-transplant</b>         | 1.74 (1.66-1.83) | <b>&lt;0.001</b> | 1.80 (1.72-1.89) | <b>&lt;0.001</b> | n/a              |                  |                  |                  |
| <b>Era of transplant</b>     |                  | <b>&lt;0.001</b> |                  | <b>&lt;0.001</b> |                  | <b>&lt;0.001</b> |                  | <b>&lt;0.001</b> |
| 2002-2004                    | 1.00             |                  | 1.00             |                  | 1.00             |                  | 1.00             |                  |
| 2005-2007                    | 1.05 (1.01-1.10) | <b>0.019</b>     | 1.04 (0.99-1.09) | 0.063            | 1.04 (1.00-1.09) | <b>0.042</b>     | 1.04 (0.99-1.08) | 0.088            |
| 2008-2010                    | 1.10 (1.05-1.15) | <b>&lt;0.001</b> | 1.05 (1.00-1.11) | <b>0.047</b>     | 1.07 (1.03-1.12) | <b>0.001</b>     | 1.04 (0.99-1.09) | 0.110            |
| 2011-2013                    | 0.98 (0.98-1.03) | 0.427            | 0.93 (0.88-0.99) | <b>0.021</b>     | 0.98 (0.94-1.03) | 0.443            | 0.94 (0.89-0.99) | <b>0.034</b>     |
| 2014-2016                    | 0.85 (0.85-0.91) | <b>&lt;0.001</b> | 0.82 (0.76-0.88) | <b>&lt;0.001</b> | 0.87 (0.84-0.94) | <b>&lt;0.001</b> | 0.85 (0.80-0.91) | <b>&lt;0.001</b> |

**Table S5. Recipient and donor factors that influence patient and overall allograft survival in all primary transplant recipients.** Missing values were treated as a separate category for MELD, recipient BMI and donor BMI. Significant determinants of were analysed by univariable Cox regression, and independent predictors were sought in a multivariable Cox regression model with a backwards stepwise approach. NASH was not selected for inclusion in the final regression models, and so was entered into models alongside the factors identified as significant. The final multivariable models were based on 66,672 patients for patient survival, and 66,491 patients for graft survival. Bold *P* values are significant at  $P<0.05$ .

|                                  | Recipients without HCC |              |                    |              | Recipients with HCC |              |                    |              |
|----------------------------------|------------------------|--------------|--------------------|--------------|---------------------|--------------|--------------------|--------------|
|                                  | Univariable            |              | Multivariable      |              | Univariable         |              | Multivariable      |              |
|                                  | HR (95% CI)            | P            | HR (95% CI)        | P            | HR (95% CI)         | P            | HR (95% CI)        | P            |
| <b>RECIPIENT CHARACTERISTICS</b> |                        |              |                    |              |                     |              |                    |              |
| <b>NASH (vs non-NASH)</b>        | 1.06 (0.96-1.17)       | 0.082        | 0.98 (0.88-1.09)   | 0.644        | 1.02 (0.91-1.15)    | 0.156        | 1.02 (0.90-1.15)   | 0.797        |
| <b>Aetiology of cirrhosis</b>    |                        | <0.001       |                    |              |                     | <0.001       |                    |              |
| NASH                             | 1.00                   |              | n/a                |              | 1.00                |              | n/a                |              |
| ARLD                             | 0.95 (0.86-1.05)       | 0.291        |                    |              | 0.93 (0.82-1.05)    | 0.240        |                    |              |
| HCV                              | 1.27 (1.14-1.40)       | <0.001       |                    |              | 1.14 (1.01-1.28)    | <b>0.040</b> |                    |              |
| AiLD                             | 0.78 (0.70-0.86)       | <0.001       |                    |              | 0.88 (0.69-1.11)    | 0.278        |                    |              |
| HBV                              | 0.72 (0.64-0.80)       | <0.001       |                    |              | 0.75 (0.65-0.86)    | <0.001       |                    |              |
| CC                               | 1.01 (0.90-1.13)       | 0.892        |                    |              | 0.99 (0.87-1.12)    | 0.842        |                    |              |
| Other                            | 0.76 (0.67-0.85)       | <0.001       |                    |              | 0.82 (0.70-0.98)    | <b>0.025</b> |                    |              |
| <b>Age (years)</b>               |                        | <0.001       |                    | <0.001       |                     | <0.001       |                    | <0.001       |
| <=45                             | 1.00                   |              | 1.00               |              | 1.00                |              | 1.00               |              |
| 46-55                            | 1.10 (1.05-1.16)       | <0.001       | 1.07 (1.02-1.12)   | <b>0.009</b> | 1.08 (0.97-1.21)    | 0.167        | 1.09 (0.98-1.22)   | 0.126        |
| 56-60                            | 1.23 (1.17-1.29)       | <0.001       | 1.18 (1.12-1.25)   | <0.001       | 1.14 (1.02-1.27)    | <b>0.024</b> | 1.14 (1.02-1.28)   | <b>0.023</b> |
| 61-65                            | 1.40 (1.32-1.48)       | <0.001       | 1.33 (1.26-1.41)   | <0.001       | 1.22 (1.10-1.37)    | <0.001       | 1.22 (1.09-1.37)   | <0.001       |
| >65                              | 1.53 (1.43-1.64)       | <0.001       | 1.48 (1.38-1.59)   | <0.001       | 1.28 (1.13-1.44)    | <0.001       | 1.30 (1.15-1.47)   | <0.001       |
| <b>Sex: male</b>                 | 1.10 (1.06-1.14)       | <0.001       | 1.09 (1.05-1.13)   | <0.001       | 0.97 (0.91-1.03)    | 0.324        | not in final model |              |
| <b>MELD</b>                      |                        | <0.001       |                    | <0.001       |                     | <0.001       |                    | <0.001       |
| ≤11                              | 1.00                   |              | 1.00               |              | 1.00                |              | 1.00               |              |
| >11, ≤14                         | 0.95 (0.87-1.03)       | 0.183        | 0.94 (0.87-1.02)   | 0.142        | 0.93 (0.85-1.02)    | 0.118        | 0.94 (0.85-1.02)   | 0.133        |
| >14, ≤18                         | 0.94 (0.87-1.01)       | 0.078        | 0.95 (0.88-1.02)   | 0.164        | 0.97 (0.89-1.05)    | 0.420        | 0.96 (0.88-1.05)   | 0.341        |
| >18, ≤23                         | 0.93 (0.86-1.00)       | 0.061        | 0.94 (0.87-1.02)   | 0.144        | 1.00 (0.89-1.11)    | 0.964        | 0.99 (0.89-1.11)   | 0.862        |
| >23                              | 1.31 (1.31-1.40)       | <0.001       | 1.31 (1.22-1.40)   | <0.001       | 1.37 (1.22-1.54)    | <0.001       | 1.36 (1.21-1.54)   | <0.001       |
| Missing value                    | 1.07 (1.07-1.15)       | <b>0.032</b> | 1.20 (1.11-1.30)   | <0.001       | 1.15 (1.08-1.23)    | <0.001       | 1.26 (1.15-1.37)   | <0.001       |
| <b>Blood group</b>               |                        | 0.967        |                    | <b>0.002</b> |                     | 0.565        | not in final model |              |
| A                                | 1.00                   |              | 1.00               |              | 1.00                |              |                    |              |
| AB                               | 0.99 (0.92-1.07)       | 0.803        | 1.21 (1.05-1.40)   | <b>0.008</b> | 0.94 (0.83-1.06)    | 0.314        |                    |              |
| B                                | 0.99 (0.94-1.05)       | 0.817        | 1.13 (0.97-1.30)   | 0.109        | 0.97 (0.89-1.05)    | 0.477        |                    |              |
| O                                | 0.99 (0.96-1.03)       | 0.628        | 0.94 (0.84-1.05)   | 0.252        | 1.01 (0.96-1.07)    | 0.690        |                    |              |
| <b>BMI (kg.m<sup>-2</sup>)</b>   |                        | <b>0.001</b> |                    | <0.001       |                     | 0.359        | not in final model |              |
| ≤18.5                            | 1.69 (1.04-1.31)       | <b>0.007</b> | 1.26 (1.12-1.42)   | <0.001       | 1.28 (0.97-1.70)    | 0.084        |                    |              |
| >18.5, ≤25.0                     | 1.00                   |              | 1.00               |              | 1.00                |              |                    |              |
| >25.0, ≤30.0                     | 0.97 (0.92-1.01)       | 0.166        | 0.92 (0.88-0.97)   | <b>0.001</b> | 0.98 (0.91-1.05)    | 0.540        |                    |              |
| >30.0, ≤35.0                     | 1.03 (0.96-1.09)       | 0.444        | 0.98 (0.92-1.05)   | 0.642        | 1.02 (0.93-1.12)    | 0.683        |                    |              |
| >35.0, ≤40.0                     | 0.98 (0.87-1.10)       | 0.770        | 0.96 (0.85-1.08)   | 0.450        | 0.89 (0.73-1.07)    | 0.210        |                    |              |
| >40.0                            | 1.25 (1.03-1.53)       | <b>0.025</b> | 1.25 (1.02-1.53)   | <b>0.029</b> | 1.03 (0.70-1.51)    | 0.884        |                    |              |
| Missing value                    | 0.96 (0.92-0.99)       | <b>0.031</b> | 0.94 (0.88-1.00)   | <b>0.047</b> | 1.02 (0.95-1.09)    | 0.623        |                    |              |
| <b>DONOR CHARACTERISTICS</b>     |                        |              |                    |              |                     |              |                    |              |
| <b>Age (years)</b>               |                        | <0.001       |                    | <0.001       |                     | <0.001       |                    | <0.001       |
| <=34                             | 1.00                   |              | 1.00               |              | 1.00                |              | 1.00               |              |
| 35-47                            | 1.20 (1.13-1.27)       | <0.001       | 1.18 (1.11-1.24)   | <0.001       | 1.05 (0.96-1.14)    | 0.275        | 1.05 (0.97-1.15)   | 0.237        |
| 48-57                            | 1.31 (1.24-1.38)       | <0.001       | 1.30 (1.23-1.37)   | <0.001       | 1.13 (1.04-1.23)    | <b>0.004</b> | 1.16 (1.06-1.26)   | <b>0.001</b> |
| 58-67                            | 1.46 (1.46-1.54)       | <0.001       | 1.45 (1.37-1.53)   | <0.001       | 1.22 (1.12-1.33)    | <0.001       | 1.25 (1.15-1.37)   | <0.001       |
| >68                              | 1.65 (1.65-1.74)       | <0.001       | 1.65 (1.56-1.75)   | <0.001       | 1.26 (1.16-1.36)    | <0.001       | 1.31 (1.20-1.42)   | <0.001       |
| <b>Sex: male</b>                 | 0.97 (0.94-1.00)       | 0.051        | not in final model |              | 0.97 (0.92-1.02)    | 0.178        | not in final model |              |
| <b>Blood group</b>               |                        | 0.145        |                    | <b>0.003</b> |                     | 0.334        | not in final model |              |
| A                                | 1.00                   |              | 1.00               |              | 1.00                |              |                    |              |
| AB                               | 0.93 (0.85-1.01)       | 0.087        | 0.81 (0.69-0.96)   | <b>0.013</b> | 0.89 (0.78-1.02)    | 0.097        |                    |              |
| B                                | 0.96 (0.91-1.02)       | 0.175        | 0.88 (0.76-1.03)   | 0.109        | 0.99 (0.91-1.07)    | 0.749        |                    |              |
| O                                | 1.01 (0.97-1.04)       | 0.748        | 1.06 (0.95-1.19)   | 0.278        | 1.01 (0.96-1.07)    | 0.698        |                    |              |
| <b>BMI (kg.m<sup>-2</sup>)</b>   |                        | <0.001       |                    | <0.001       |                     | 0.281        |                    | <b>0.001</b> |
| ≤18.5                            | 0.94 (0.83-1.07)       | 0.364        | 0.94 (0.82-1.08)   | 0.400        | 1.05 (0.85-1.28)    | 0.667        | 1.03 (0.84-1.27)   | 0.781        |
| >18.5, ≤25.0                     | 1.00                   |              | 1.00               |              | 1.00                |              | 1.00               |              |
| >25.0, ≤30.0                     | 1.12 (1.08-1.17)       | <0.001       | 1.05 (1.01-1.10)   | <b>0.018</b> | 1.07 (0.99-1.14)    | 0.065        | 1.05 (0.98-1.13)   | 0.160        |

|                          |                  |                  |                  |                  |                  |                  |                  |                  |
|--------------------------|------------------|------------------|------------------|------------------|------------------|------------------|------------------|------------------|
| >30.0, ≤35.0             | 1.11 (1.03-1.19) | <b>0.006</b>     | 1.05 (0.98-1.13) | 0.161            | 1.09 (0.98-1.21) | 0.114            | 1.07 (0.97-1.19) | 0.192            |
| >35.0, ≤40.0             | 1.10 (0.96-1.27) | 0.176            | 1.06 (0.92-1.22) | 0.432            | 1.14 (0.94-1.39) | 0.189            | 1.16 (0.95-1.42) | 0.151            |
| >40.0                    | 0.88 (0.69-1.11) | 0.277            | 0.85 (0.67-1.08) | 0.192            | 1.07 (0.78-1.47) | 0.687            | 1.12 (0.81-1.53) | 0.500            |
| Missing value            | 0.91 (0.87-0.95) | <0.001           | 0.84 (0.80-0.89) | <b>&lt;0.001</b> | 1.00 (0.94-1.07) | 0.961            | 0.89 (0.83-0.96) | <b>0.002</b>     |
| <b>Type of donor</b>     |                  | <b>0.001</b>     |                  | <b>&lt;0.001</b> |                  | 0.078            |                  | <b>&lt;0.001</b> |
| DBD                      | 1.00             |                  | 1.00             |                  | 1.00             |                  | 1.00             |                  |
| DCD                      | 0.91 (0.81-1.02) | 0.123            | 0.98 (0.87-1.11) | 0.783            | 1.12 (0.96-1.30) | 0.147            | 1.23 (1.05-1.43) | <b>0.010</b>     |
| Domino                   | 1.21 (1.02-1.44) | <b>0.032</b>     | 1.30 (1.08-1.55) | <b>0.004</b>     | 1.10 (0.92-1.32) | 0.287            | 1.15 (0.96-1.38) | 0.127            |
| Living                   | 1.12 (1.04-1.20) | <b>0.003</b>     | 1.37 (1.26-1.48) | <b>&lt;0.001</b> | 1.13 (1.00-1.26) | <b>0.046</b>     | 1.30 (1.15-1.47) | <b>&lt;0.001</b> |
| <b>OTHER VARIABLES</b>   |                  |                  |                  |                  |                  |                  |                  |                  |
| <b>Era of transplant</b> |                  | <b>&lt;0.001</b> |                  | <b>&lt;0.001</b> |                  | <b>&lt;0.001</b> |                  | <b>0.012</b>     |
| 2002-2004                | 1.00             |                  | 1.00             |                  | 1.00             |                  | 1.00             |                  |
| 2005-2007                | 1.04 (0.99-1.09) | 0.125            | 1.03 (0.98-1.08) | 0.251            | 1.00 (0.93-1.08) | 0.908            | 1.04 (0.96-1.12) | 0.361            |
| 2008-2010                | 1.10 (1.04-1.15) | <b>&lt;0.001</b> | 1.04 (0.98-1.10) | 0.166            | 0.96 (0.89-1.04) | 0.293            | 1.02 (0.94-1.11) | 0.646            |
| 2011-2013                | 1.00 (0.95-1.06) | 0.970            | 0.93 (0.87-0.99) | <b>0.029</b>     | 0.88 (0.81-0.95) | <b>0.002</b>     | 0.96 (0.87-1.06) | 0.416            |
| 2014-2016                | 0.90 (0.85-0.97) | <b>&lt;0.001</b> | 0.85 (0.78-0.91) | <b>&lt;0.001</b> | 0.81 (0.73-0.89) | <b>&lt;0.001</b> | 0.87 (0.77-0.98) | <b>0.019</b>     |

**Table S6. Recipient and donor factors that influence overall allograft survival in transplant recipients.** Missing values were treated as a separate category for MELD, recipient BMI and donor BMI. Determinants of graft survival were analysed by univariable Cox regression. Independent predictors were sought in a multivariable Cox regression model with a backwards stepwise approach. NASH was not selected for inclusion in the final regression models, and so was entered into models alongside the factors identified as significant. The final multivariable models were based on 47,040 patients for those without HCC, and 19,514 patients for those with HCC. Bold *P* values are significant at  $P<0.05$



| Causes of deaths in transplant recipients (without HCC) |                |               |                |                  |                 |                |                                   |                   |                     |                  |
|---------------------------------------------------------|----------------|---------------|----------------|------------------|-----------------|----------------|-----------------------------------|-------------------|---------------------|------------------|
| N; (%)                                                  | ARLD<br>N=4664 | HCV<br>N=3022 | AiLD<br>N=1523 | HBV<br>N=77<br>0 | CC<br>N=98<br>0 | Other<br>N=645 | Non-NASH<br>cumulative<br>N=11604 | NASH<br>N=35<br>9 | HR (CI)             | P                |
| Infection                                               | 1011<br>(21.7) | 629<br>(20.8) | 347<br>(22.8)  | 179<br>(23.2)    | 197<br>(20.1)   | 149<br>(23.1)  | 2512<br>(21.6)                    | 86<br>(24.0)      | 1.15<br>(0.92-1.42) | 0.216            |
| Cardio/cerebrovascular complication                     | 417<br>(8.9)   | 245<br>(8.1)  | 104<br>(6.8)   | 54<br>(7.0)      | 61<br>(6.2)     | 56<br>(8.7)    | 937<br>(8.1)                      | 19<br>(5.3)       | 0.70<br>(0.44-1.10) | 0.123            |
| Primary non-function or dysfunction                     | 128<br>(2.7)   | 96<br>(3.2)   | 63<br>(4.1)    | 37<br>(4.8)      | 33<br>(3.4)     | 21<br>(3.3)    | 378<br>(3.3)                      | 16<br>(4.5)       | 1.26<br>(0.77-2.08) | 0.360            |
| Rejection (acute or chronic)                            | 111<br>(2.4)   | 73<br>(2.4)   | 49<br>(3.2)    | 22<br>(2.9)      | 30<br>(3.1)     | 17<br>(2.6)    | 302<br>(2.6)                      | 14<br>(3.9)       | 1.69<br>(0.99-2.89) | 0.055            |
| Gastrointestinal complications                          | 132<br>(2.8)   | 102<br>(3.4)  | 35<br>(2.3)    | 19<br>(2.5)      | 30<br>(3.1)     | 15<br>(2.3)    | 333<br>(2.9)                      | 10<br>(2.8)       | 0.73<br>(0.32-1.64) | 0.967            |
| Malignancy – solid organ extrahepatic                   | 603<br>(12.9)  | 122<br>(4.0)  | 101<br>(6.6)   | 52<br>(6.8)      | 42<br>(4.3)     | 37<br>(5.7)    | 957<br>(8.2)                      | 9<br>(2.5)        | 0.41<br>(0.21-0.79) | <b>0.008</b>     |
| Other liver complication                                | 116<br>(2.5)   | 68<br>(2.3)   | 47<br>(3.1)    | 20<br>(2.6)      | 27<br>(2.8)     | 20<br>(3.1)    | 298<br>(2.6)                      | 7<br>(1.9)        | 0.79<br>(0.37-1.67) | 0.534            |
| Biliary complications                                   | 93<br>(2.0)    | 55<br>(1.8)   | 46<br>(3.0)    | 28<br>(3.6)      | 14<br>(1.4)     | 10<br>(1.6)    | 246<br>(2.1)                      | 6<br>(1.7)        | 0.84<br>(0.37-1.88) | 0.663            |
| Vascular complications                                  | 115<br>(2.5)   | 46<br>(1.5)   | 31<br>(2.0)    | 31<br>(4.0)      | 24<br>(2.4)     | 13<br>(2.0)    | 260<br>(2.2)                      | 6<br>(1.7)        | 0.73<br>(0.32-1.64) | 0.444            |
| Malignancy – recurrence of HCC                          | 55<br>(1.2)    | 66<br>(2.2)   | 42<br>(2.8)    | 19<br>(2.5)      | 16<br>(1.6)     | 7<br>(1.1)     | 205<br>(1.8)                      | 6<br>(1.7)        | 1.11<br>(0.49-2.51) | 0.798            |
| Malignancy – lymphoproliferative                        | 40<br>(0.9)    | 34<br>(1.1)   | 25<br>(1.6)    | 6<br>(0.8)       | 5<br>(0.5)      | 13<br>(2.0)    | 123<br>(1.1)                      | 5<br>(1.4)        | 1.65<br>(0.67-4.03) | 0.274            |
| Intraoperative                                          | 49<br>(1.1)    | 39<br>(1.3)   | 16<br>(1.1)    | 13<br>(1.7)      | 10<br>(1.0)     | 9<br>(1.4)     | 136<br>(1.2)                      | 5<br>(1.4)        | 1.06<br>(0.43-2.58) | 0.902            |
| Recurrence of 1° liver pathology (non-malignant)        | 190<br>(4.1)   | 651<br>(21.5) | 42<br>(2.8)    | 28<br>(3.6)      | 12<br>(1.2)     | 12<br>(1.9)    | 935<br>(8.1)                      | 2<br>(0.6)        | 0.08<br>(0.02-0.33) | <b>&lt;0.001</b> |
| Other                                                   | 146<br>(3.1)   | 112<br>(3.7)  | 45<br>(3.0)    | 35<br>(4.5)      | 44<br>(4.5)     | 24<br>(3.7)    | 406<br>(3.5)                      | 9<br>(2.5)        | 0.76<br>(0.39-1.47) | 0.418            |
| Unknown                                                 | 1458<br>(31.3) | 684<br>(22.6) | 530<br>(34.8)  | 227<br>(29.5)    | 435<br>(44.4)   | 242<br>(37.5)  | 3576<br>(30.8)                    | 159<br>(44.3)     | 1.61<br>(1.38-1.89) | <b>&lt;0.001</b> |

**Table S7. Causes of death in patients without HCC undergoing primary LT.**

Univariable Cox regression models were used to compare cause-specific mortality rates between NASH and non-NASH recipients. Causes of death were grouped into 15 categories: 1) Intraoperative deaths; 2) Primary non- or dysfunction; 3) Vascular complications (hepatic artery/vein thrombosis, early portal vein thrombosis, outflow impairment); 4) Biliary complications; 5) Recurrence of primary non-malignant liver pathology; 6) Rejection; 7) Other liver complications (massive hemorrhagic necrosis, de-novo viral hepatitis, other); 8) Malignancy: HCC; 9) Malignancy: extra-hepatic solid organ; 10) Malignancy: lymphoproliferative; 11) Gastrointestinal complications (visceral

perforation, pancreatitis, other); 12) Infection; 13) Cardio/cerebrovascular complication (myocardial infarction, ischaemic stroke, intracranial hemorrhage, other); 14) Other (including any complication with an overall burden of <1% of deaths – kidney failure, venous thromboembolism, trauma, suicide, bone marrow depression, neurological complication, other); 15) Unknown. Causes of death listed in order of frequency in patients transplanted for NASH. Bold *P* values are significant at  $P<0.05$ .

| Causes of deaths in transplant recipients (with HCC)    |                |               |              |               |               |                |                                  |               |                     |                  |
|---------------------------------------------------------|----------------|---------------|--------------|---------------|---------------|----------------|----------------------------------|---------------|---------------------|------------------|
| N; (%)                                                  | ARLD<br>N=1228 | HCV<br>N=2250 | AiLD<br>N=73 | HBV<br>N=609  | CC<br>N=1015  | Other<br>N=210 | Non-NASH<br>cumulative<br>N=5385 | NASH<br>N=272 | HR (CI)             | P                |
| <b>Malignancy – recurrence of HCC</b>                   | 178<br>(14.5)  | 407<br>(18.1) | 7<br>(9.6)   | 166<br>(27.3) | 146<br>(14.4) | 33<br>(15.7)   | 937<br>(17.4)                    | 53<br>(19.5)  | 1.24<br>(0.94-1.64) | 0.123            |
| <b>Infection</b>                                        | 187<br>(15.2)  | 376<br>(16.7) | 17<br>(23.3) | 74<br>(12.2)  | 128<br>(12.6) | 47<br>(22.4)   | 829<br>(15.4)                    | 28<br>(10.3)  | 0.69<br>(0.47-1.00) | <b>0.049</b>     |
| <b>Malignancy – solid organ extrahepatic</b>            | 216<br>(17.6)  | 146<br>(6.5)  | 6<br>(8.2)   | 48<br>(7.9)   | 126<br>(12.4) | 22<br>(10.5)   | 564<br>(10.5)                    | 18<br>(6.6)   | 0.77<br>(0.48-1.23) | 0.277            |
| <b>Cardio/cerebrovascular complication</b>              | 83<br>(6.8)    | 124<br>(5.5)  | 4<br>(5.5)   | 40<br>(6.6)   | 44<br>(4.3)   | 14<br>(6.7)    | 309<br>(5.7)                     | 13<br>(4.8)   | 0.89<br>(0.51-1.56) | 0.693            |
| <b>Other liver complication</b>                         | 16<br>(1.3)    | 29<br>(1.3)   | 1<br>(1.4)   | 12<br>(2.0)   | 17<br>(1.7)   | 5<br>(2.4)     | 80<br>(1.5)                      | 11<br>(4.0)   | 2.76<br>(1.47-5.19) | <b>0.002</b>     |
| <b>Primary non-function or dysfunction</b>              | 31<br>(2.5)    | 55<br>(2.4)   | 4<br>(5.5)   | 22<br>(3.6)   | 28<br>(2.8)   | 2<br>(1.0)     | 142<br>(2.6)                     | 8<br>(2.9)    | 1.02<br>(0.50-2.08) | 0.960            |
| <b>Gastrointestinal complications</b>                   | 34<br>(2.8)    | 49<br>(2.2)   | 2<br>(2.7)   | 19<br>(3.1)   | 24<br>(2.4)   | 5<br>(2.4)     | 133<br>(2.5)                     | 7<br>(2.6)    | 1.11<br>(0.52-2.38) | 0.788            |
| <b>Recurrence of 1° liver pathology (non-malignant)</b> | 85<br>(6.9)    | 468<br>(20.8) | 3<br>(4.1)   | 32<br>(5.3)   | 63<br>(6.2)   | 6<br>(2.9)     | 657<br>(12.2)                    | 6<br>(2.2)    | 0.21<br>(0.09-0.46) | <b>&lt;0.001</b> |
| <b>Vascular complications</b>                           | 22<br>(1.8)    | 44<br>(2.0)   | 1<br>(1.4)   | 13<br>(2.1)   | 15<br>(1.5)   | 4<br>(1.9)     | 99<br>(1.8)                      | 4<br>(1.5)    | 0.76<br>(0.28-2.07) | 0.596            |
| <b>Rejection (acute or chronic)</b>                     | 19<br>(1.5)    | 36<br>(1.6)   | 1<br>(1.4)   | 7<br>(1.1)    | 11<br>(1.1)   | 7<br>(3.3)     | 81<br>(1.5)                      | 4<br>(1.5)    | 1.05<br>(0.38-2.86) | 0.928            |
| <b>Malignancy – lymphoproliferative</b>                 | 11<br>(0.9)    | 25<br>(1.1)   | 3<br>(4.1)   | 10<br>(1.6)   | 3<br>(0.3)    | 4<br>(1.9)     | 56<br>(1.0)                      | 3<br>(1.1)    | 1.28<br>(0.40-4.09) | 0.681            |
| <b>Biliary complications</b>                            | 22<br>(1.8)    | 34<br>(1.5)   | 1<br>(1.4)   | 6<br>(1.0)    | 9<br>(0.9)    | 2<br>(1.0)     | 74<br>(1.4)                      | 1<br>(0.4)    | 0.28<br>(0.04-2.01) | 0.205            |
| <b>Intraoperative</b>                                   | 9<br>(0.7)     | 24<br>(1.1)   | 0<br>(0.0)   | 4<br>(0.7)    | 10<br>(1.0)   | 0<br>(0.0)     | 47<br>(0.9)                      | 2<br>(0.7)    | 0.79<br>(0.19-3.26) | 0.748            |
| <b>Other</b>                                            | 38<br>(3.1)    | 63<br>(2.8)   | 1<br>(1.4)   | 11<br>(1.8)   | 37<br>(3.6)   | 4<br>(1.9)     | 154<br>(2.9)                     | 7<br>(2.6)    | 1.09<br>(0.48-2.47) | 0.846            |
| <b>Unknown</b>                                          | 277<br>(22.6)  | 370<br>(16.4) | 22<br>(30.1) | 145<br>(23.8) | 354<br>(34.9) | 55<br>(26.2)   | 1223<br>(22.7)                   | 107<br>(39.3) | 1.89<br>(1.55-2.30) | <b>&lt;0.001</b> |

**Table S8. Causes of death in patients with HCC undergoing primary LT. Univariable**

Cox regression models were used to compare cause-specific mortality rates between NASH and non-NASH recipients. Causes of death were grouped into 15 categories: 1) Intraoperative deaths; 2) Primary non- or dysfunction; 3) Vascular complications (hepatic artery/vein thrombosis, early portal vein thrombosis, outflow impairment); 4) Biliary complications; 5) Recurrence of primary non-malignant liver pathology; 6) Rejection; 7) Other liver complications (massive hemorrhagic necrosis, de-novo viral hepatitis, other); 8) Malignancy: HCC; 9) Malignancy: extra-hepatic solid organ; 10) Malignancy:

lymphoproliferative; 11) Gastrointestinal complications (visceral perforation, pancreatitis, other); 12) Infection; 13) Cardio/cerebrovascular complication (myocardial infarction, ischaemic stroke, intracranial hemorrhage, other); 14) Other (including any complication with an overall burden of <1% of deaths – kidney failure, venous thromboembolism, trauma, suicide, bone marrow depression, neurological complication, other); 15) Unknown. Causes of death listed in order of frequency in patients transplanted for NASH. Bold *P* values are significant at  $P<0.05$ .

|                                  | Univariable      | Multivariable      |
|----------------------------------|------------------|--------------------|
|                                  | HR (95% CI)      |                    |
| <b>RECIPIENT CHARACTERISTICS</b> |                  |                    |
| <b>Age (years)</b>               | Overall          |                    |
| ≤45                              | 1.00             | not in final model |
| 46-55                            | 1.94 (0.82-4.56) |                    |
| 56-60                            | 2.30 (1.00-5.29) |                    |
| 61-65                            | 2.20 (0.96-5.05) |                    |
| >65                              | 2.85 (1.23-6.59) |                    |
| <b>Sex: male</b>                 | 1.03 (0.76-1.40) | not in final model |
| <b>MELD</b>                      | Overall          |                    |
| ≤11                              | 1.00             | not in final model |
| >11, ≤14                         | 0.59 (0.40-0.86) |                    |
| >14, ≤18                         | 0.85 (0.61-1.18) |                    |
| >18, ≤23                         | 0.88 (0.57-1.36) |                    |
| >23                              | 1.23 (0.80-1.89) |                    |
| Missing value                    | 0.75 (0.47-1.19) |                    |
| <b>Blood group</b>               | Overall          |                    |
| A                                | 1.00             | not in final model |
| AB                               | 1.22 (0.75-1.98) |                    |
| B                                | 0.85 (0.58-1.24) |                    |
| O                                | 0.93 (0.72-1.22) |                    |
| <b>BMI (kg.m<sup>-2</sup>)</b>   | Overall          |                    |
| ≤18.5                            | n/a              | not in final model |
| >18.5, ≤25.0                     | 1.94 (0.63-5.95) |                    |
| >25.0, ≤30.0                     | 1.00             |                    |
| >30.0, ≤35.0                     | 1.98 (1.13-3.47) |                    |
| >35.0, ≤40.0                     | 1.63 (0.87-3.06) |                    |
| >40.0                            | 2.58 (1.15-5.75) |                    |
| Missing value                    | 1.94 (0.63-5.95) |                    |
| <b>DONOR CHARACTERISTICS</b>     |                  |                    |
| <b>Age (years)</b>               | Overall          |                    |
| ≤45                              | 1.00             | not in final model |
| 46-55                            | 1.26 (0.82-1.93) |                    |
| 56-60                            | 1.06 (0.71-1.60) |                    |
| 61-65                            | 1.15 (0.75-1.75) |                    |
| >65                              | 1.33 (0.89-1.99) |                    |
| <b>Sex: male</b>                 | 0.97 (0.76-1.24) | not in final model |
| <b>Blood group</b>               | Overall          |                    |
| A                                | 1.00             | not in final model |
| AB                               | 1.28 (0.76-2.15) |                    |
| B                                | 0.74 (0.49-1.12) |                    |
| O                                | 0.96 (0.74-1.25) |                    |
| <b>BMI (kg.m<sup>-2</sup>)</b>   | Overall          |                    |
| ≤18.5                            | 1.23 (0.30-4.96) | not in final model |

|                          |                  |                    |
|--------------------------|------------------|--------------------|
| >18.5, ≤25.0             | 0.99 (0.75-1.30) |                    |
| >25.0, ≤30.0             | 1.00             |                    |
| >30.0, ≤35.0             | 0.74 (0.49-1.12) |                    |
| >35.0, ≤40.0             | 1.14 (0.64-2.03) |                    |
| >40.0                    | 1.85 (0.90-3.78) |                    |
| Missing value            | 0.66 (0.39-1.09) |                    |
| <b>Type of donor</b>     | Overall          |                    |
| DBD                      | 1.00             | not in final model |
| DCD                      | 0.78 (0.45-1.34) |                    |
| Domino                   | 0.77 (0.25-2.41) |                    |
| Living                   | 1.54 (0.84-1.82) |                    |
| <b>OTHER VARIABLES</b>   |                  |                    |
| <b>Era of transplant</b> | Overall          |                    |
| 2002-2004                | 1.00             | n/a                |
| 2005-2007                | 0.76 (0.43-1.32) |                    |
| 2008-2010                | 1.05 (0.62-1.78) |                    |
| 2011-2013                | 0.72 (0.41-1.26) |                    |
| 2014-2016                | 0.56 (0.31-1.02) |                    |

**Table S9. Recipient and donor factors that significantly affect post-transplant survival in patients transplanted for NASH without HCC.** The final multivariable models were based on 1,043 patients. \* $P < 0.05$ ; \*\* $P < 0.001$

|                                          | Pure NASH<br>N=1171 | Presumed<br>NASH<br>N=1570 | <i>P</i>         |
|------------------------------------------|---------------------|----------------------------|------------------|
| <b>RECIPIENT CHARACTERISTICS</b>         |                     |                            |                  |
| <b>Age; years; median (IQR)</b>          | 60 (54-65)          | 59 (53-64)                 | <b>&lt;0.001</b> |
| <b>Sex: male; %</b>                      | 68.7                | 72.9                       | <b>0.017</b>     |
| <b>Blood group; %</b>                    |                     |                            | <b>0.002</b>     |
| A                                        | 43.6                | 43.5                       |                  |
| AB                                       | 4.0                 | 7.2                        |                  |
| B                                        | 12.7                | 13.3                       |                  |
| O                                        | 39.7                | 36.0                       |                  |
| <b>BMI; kg.m<sup>-2</sup>; mean (SD)</b> | 31.2 (5.2)          | 33.5 (3.8)                 | <b>&lt;0.001</b> |
| <b>MELD; median (IQR)</b>                | 16 (13-21)          | 15 (11-21)                 | <b>0.002</b>     |
| <b>HCC; %</b>                            | 28.5                | 47.1                       | <b>&lt;0.001</b> |
| <b>DONOR CHARACTERISTICS</b>             |                     |                            |                  |
| <b>Age; years; median (IQR)</b>          | 53 (41-64)          | 52 (39-63)                 | 0.139            |
| <b>Sex: male; %</b>                      | 59.9                | 64.1                       | <b>0.030</b>     |
| <b>Blood group; %</b>                    |                     |                            | <b>0.003</b>     |
| A                                        | 41.6                | 42.0                       |                  |
| AB                                       | 2.9                 | 5.7                        |                  |
| B                                        | 10.9                | 11.5                       |                  |
| O                                        | 44.6                | 40.9                       |                  |
| <b>BMI; kg.m<sup>-2</sup>; mean (SD)</b> | 26.8 (4.7)          | 27.0 (4.9)                 | 0.719            |
| <b>Type of donor; %</b>                  |                     |                            | <b>&lt;0.001</b> |
| DBD                                      | 80.5                | 87.6                       |                  |
| DCD                                      | 12.1                | 2.5                        |                  |
| Domino                                   | 1.1                 | 0.6                        |                  |
| Living                                   | 6.3                 | 9.2                        |                  |

**Table S10. Donor and recipient factors in patients transplanted for pure NASH and presumed NASH.** Comparisons between groups were performed using Mann-Whitney U tests, chi-squared tests and t-tests, as applicable, and bold *P*-values are significant at *P*<0.05.

|              | <b>HCC</b><br>N (%) |
|--------------|---------------------|
| <b>NASH</b>  | 1073 (39.1)         |
| <b>ARLD</b>  | 4717 (21.2)         |
| <b>HCV</b>   | 7118 (44.1)         |
| <b>AiLD</b>  | 320 (3.4)           |
| <b>HBV</b>   | 2857 (38.9)         |
| <b>CC</b>    | 3229 (46.1)         |
| <b>Other</b> | 881 (20.9)          |
| <b>Total</b> | 20195 (29.3)        |

**Table S11. The prevalence of HCC in patients transplanted with liver disease of different aetiologies.**



|                                  | Complete cases<br>N=38,084 | Cases with<br>missing values*<br>N=30,886 | P                |
|----------------------------------|----------------------------|-------------------------------------------|------------------|
| <b>RECIPIENT CHARACTERISTICS</b> |                            |                                           |                  |
| <b>Age; years; median (IQR)</b>  | 55 (48-61)                 | 55 (48-61)                                | <b>&lt;0.001</b> |
| <b>Sex: male; %</b>              | 71.1                       | 73.3                                      | <b>&lt;0.001</b> |
| <b>Aetiology</b>                 |                            |                                           | <b>&lt;0.001</b> |
| NASH                             | 6.1                        | 1.3                                       |                  |
| ARLD                             | 30.9                       | 33.9                                      |                  |
| HCV                              | 17.7                       | 30.4                                      |                  |
| AiLD                             | 15.2                       | 11.4                                      |                  |
| HBV                              | 11.1                       | 10.0                                      |                  |
| CC                               | 11.0                       | 9.1                                       |                  |
| Other                            | 8.0                        | 3.8                                       |                  |
| <b>Blood group; %</b>            |                            |                                           | <b>&lt;0.001</b> |
| A                                | 43.2                       | 44.1                                      |                  |
| AB                               | 6.0                        | 5.2                                       |                  |
| B                                | 13.3                       | 11.9                                      |                  |
| O                                | 37.5                       | 38.8                                      |                  |
| <b>HCC; %</b>                    | 28.6                       | 30.1                                      | <b>&lt;0.001</b> |
| <b>DONOR CHARACTERISTICS</b>     |                            |                                           |                  |
| <b>Age; median (IQR)</b>         | 52 (38-64)                 | 52 (38-65)                                | 0.241            |
| <b>Sex: male; %</b>              | 56.7                       | 59.1                                      | <b>&lt;0.001</b> |
| <b>Blood group; %</b>            |                            |                                           | <b>0.001</b>     |
| A                                | 42.1                       | 43.3                                      |                  |
| AB                               | 4.3                        | 4.2                                       |                  |
| B                                | 12.0                       | 11.2                                      |                  |
| O                                | 41.6                       | 41.2                                      |                  |
| <b>Type of donor; % **</b>       |                            |                                           | <b>&lt;0.001</b> |
| DBD                              | 86.2                       | 95.1                                      |                  |
| DCD                              | 4.7                        | 0.3                                       |                  |
| Domino                           | 0.5                        | 1.5                                       |                  |
| Living                           | 8.6                        | 3.1                                       |                  |

**Table S12. Comparison of donor and recipient factors in patients transplanted for NASH and non-NASH indications. \*Missing data points in one of MELD, recipient BMI or donor BMI.**

|                                  | Missing indicator analysis<br>N = 47,040 | Available case analysis<br>N = 28,643 |
|----------------------------------|------------------------------------------|---------------------------------------|
| HR (95% CI)                      |                                          |                                       |
| <b>RECIPIENT CHARACTERISTICS</b> |                                          |                                       |
| <b>NASH (vs non-NASH)</b>        | 0.97 (0.86-1.09)                         | 1.02 (0.90-1.16)                      |
| <b>Age (years)</b>               | <b>Overall**</b>                         | <b>Overall**</b>                      |
| </=45                            | 1.00                                     | 1.00                                  |
| 46-55                            | <b>1.24 (1.18-1.31)**</b>                | <b>1.37 (1.27-1.48)**</b>             |
| 56-60                            | <b>1.49 (1.41-1.59)**</b>                | <b>1.63 (1.50-1.77)**</b>             |
| 61-65                            | <b>1.78 (1.67-1.89)**</b>                | <b>1.99 (1.82-2.17)**</b>             |
| >65                              | <b>2.04 (1.89-2.20)**</b>                | <b>2.19 (1.97-2.42)**</b>             |
| <b>Sex: male</b>                 | <b>1.11 (1.06-1.15)**</b>                | <b>1.12 (1.06-1.18)**</b>             |
| <b>MELD</b>                      | <b>Overall**</b>                         | <b>Overall**</b>                      |
| ≤11                              | 1.00                                     | 1.00                                  |
| >11, ≤14                         | 0.98 (0.89-1.07)                         | 0.97 (0.88-1.06)                      |
| >14, ≤18                         | 1.02 (0.94-1.11)                         | 1.01 (0.92-1.10)                      |
| >18, ≤23                         | 1.05 (0.96-1.15)                         | 1.05 (0.95-1.15)                      |
| >23                              | <b>1.52 (1.40-1.64)**</b>                | <b>1.54 (1.41-1.67)**</b>             |
| Missing value                    | <b>1.22 (1.12-1.33)**</b>                | n/a                                   |
| <b>Blood group</b>               | <b>Overall*</b>                          | <b>Overall*</b>                       |
| A                                | 1.00                                     | 1.00                                  |
| AB                               | <b>1.18 (1.01-1.38)*</b>                 | <b>1.27 (1.06-1.54)*</b>              |
| B                                | 1.12 (0.95-1.31)                         | <b>1.23 (1.01-1.50)*</b>              |
| O                                | 0.94 (0.84-1.07)                         | 1.05 (0.90-1.23)                      |
| <b>BMI (kg.m<sup>-2</sup>)</b>   | <b>Overall**</b>                         | <b>Overall**</b>                      |
| ≤18.5                            | <b>1.34 (1.18-1.52)**</b>                | <b>1.30 (1.13-1.51)**</b>             |
| >18.5, ≤25.0                     | 1.00                                     | 1.00                                  |
| >25.0, ≤30.0                     | 0.95 (0.90-1.01)                         | 0.95 (0.89-1.01)                      |
| >30.0, ≤35.0                     | 1.04 (0.97-1.12)                         | 1.02 (0.95-1.11)                      |
| >35.0, ≤40.0                     | 1.06 (0.93-1.21)                         | 1.01 (0.88-1.16)                      |
| >40.0                            | <b>1.35 (1.09-1.67)*</b>                 | <b>1.38 (1.10-1.73)*</b>              |
| Missing value                    | 1.04 (0.98-1.11)                         | n/a                                   |
| <b>DONOR CHARACTERISTICS</b>     |                                          |                                       |
| <b>Age (years)</b>               | <b>Overall**</b>                         | <b>Overall**</b>                      |
| </=34                            | 1.00                                     | 1.00                                  |
| 35-47                            | <b>1.16 (1.09-1.23)**</b>                | <b>1.16 (1.07-1.26)**</b>             |
| 48-57                            | <b>1.25 (1.18-1.33)**</b>                | <b>1.25 (1.15-1.36)**</b>             |
| 58-67                            | <b>1.38 (1.29-1.47)**</b>                | <b>1.38 (1.26-1.50)**</b>             |
| >68                              | <b>1.52 (1.43-1.62)**</b>                | <b>1.54 (1.41-1.68)**</b>             |
| <b>Sex: male</b>                 | not in final model                       | not in final model                    |
| <b>Blood group</b>               | <b>Overall*</b>                          | <b>Overall*</b>                       |
| A                                | 1.00                                     | 1.00                                  |
| AB                               | <b>0.82 (0.68-0.97)*</b>                 | <b>0.75 (0.60-0.93)*</b>              |
| B                                | 0.90 (0.76-1.06)                         | <b>0.78 (0.64-0.96)*</b>              |
| O                                | 1.07 (0.95-1.21)                         | 0.96 (0.82-1.12)                      |

|                                |                           |                           |
|--------------------------------|---------------------------|---------------------------|
| <b>BMI (kg.m<sup>-2</sup>)</b> | <b>Overall**</b>          |                           |
| ≤18.5                          | 0.91 (0.79-1.06)          | not in final model        |
| >18.5, ≤25.0                   | 1.00                      |                           |
| >25.0, ≤30.0                   | 1.02 (0.97-1.07)          |                           |
| >30.0, ≤35.0                   | 1.02 (0.94-1.11)          |                           |
| >35.0, ≤40.0                   | 1.02 (0.88-1.19)          |                           |
| >40.0                          | 0.85 (0.66-1.10)          |                           |
| Missing value                  | <b>0.85 (0.80-0.90)**</b> | n/a                       |
| <b>Type of donor</b>           | <b>Overall**</b>          | <b>Overall**</b>          |
| DBD                            | 1.00                      | 1.00                      |
| DCD                            | <b>0.73 (0.62-0.85)**</b> | <b>0.73 (0.62-0.85)**</b> |
| Domino                         | 1.20 (0.99-1.45)          | 1.22 (0.88-1.68)          |
| Living                         | <b>1.43 (1.31-1.56)**</b> | <b>1.59 (1.44-1.76)**</b> |
| <b>OTHER VARIABLES</b>         |                           |                           |
| <b>Re-transplant</b>           | <b>1.80 (1.71-1.91)**</b> | <b>1.95 (1.81-2.11)**</b> |
| <b>Era of transplant</b>       | <b>Overall**</b>          | <b>Overall**</b>          |
| 2002-2004                      | 1.00                      | 1.00                      |
| 2005-2007                      | 1.03 (0.98-1.09)          | <b>1.18 (1.06-1.30)**</b> |
| 2008-2010                      | <b>1.07 (1.00-1.13)*</b>  | <b>1.20 (1.09-1.33)**</b> |
| 2011-2013                      | <b>0.93 (0.87-0.99)*</b>  | 1.03 (0.93-1.15)          |
| 2014-2016                      | <b>0.81 (0.75-0.89)**</b> | <b>0.90 (0.80-1.01)*</b>  |

**Table S13. Multivariable analyses by different methods to determine recipient and donor factors that influence patient survival in transplant recipients without HCC.**

\* $P < 0.05$ ; \*\* $P < 0.001$

|                                                |                                             |
|------------------------------------------------|---------------------------------------------|
| <b>Missing indicator analysis</b><br>N = 1,628 | <b>Available case analysis</b><br>N = 1,493 |
|------------------------------------------------|---------------------------------------------|

| <b>RECIPIENT CHARACTERISTICS</b> |                           |                           |
|----------------------------------|---------------------------|---------------------------|
| <b>Age (years)</b>               | <b>Overall**</b>          | <b>Overall**</b>          |
| ≤45                              | 1.00                      | 1.00                      |
| 46-55                            | 1.31 (0.87-1.98)          | 1.33 (0.87-2.04)          |
| 56-60                            | 1.23 (0.81-1.87)          | 1.37 (0.89-2.12)          |
| 61-65                            | <b>2.07 (1.39-3.08)**</b> | <b>2.20 (1.46-3.31)**</b> |
| >65                              | <b>1.72 (1.10-2.71)*</b>  | <b>1.70 (1.07-2.71)*</b>  |
| <b>Sex: male</b>                 | <b>0.79 (0.63-0.98)*</b>  | <b>0.78 (0.62-0.98)*</b>  |
| <b>MELD</b>                      | <b>Overall**</b>          | <b>Overall**</b>          |
| ≤11                              | 1.00                      | 1.00                      |
| >11, ≤14                         | 1.03 (0.66-1.62)          | 1.03 (0.67-1.59)          |
| >14, ≤18                         | 0.66 (0.44-1.06)          | 0.66 (0.44-1.01)          |
| >18, ≤23                         | 0.71 (0.47-1.15)          | 0.71 (0.46-1.10)          |
| >23                              | <b>1.48 (1.04-2.30)*</b>  | <b>1.49 (1.01-2.19)*</b>  |
| Missing value                    | 0.93 (0.57-1.51)          | n/a                       |
| <b>Blood group</b>               | not in final model        | not in final model        |
| A                                |                           |                           |
| AB                               |                           |                           |
| B                                |                           |                           |
| O                                |                           |                           |
| <b>BMI (kg.m<sup>-2</sup>)</b>   | <b>Overall*</b>           | <b>Overall*</b>           |
| ≤18.5                            | <b>4.29 (1.01-18.21)*</b> | <b>4.71 (1.11-20.11)*</b> |
| >18.5, ≤25.0                     | <b>2.24 (1.27-3.96)*</b>  | <b>2.13 (1.99-3.80)*</b>  |
| >25.0, ≤30.0                     | 1.00                      | 1.00                      |
| >30.0, ≤35.0                     | 1.38 (0.95-2.01)          | 1.34 (0.92-1.94)          |
| >35.0, ≤40.0                     | 1.43 (0.93-2.18)          | 1.30 (0.85-1.99)          |
| >40.0                            | <b>1.96 (1.16-3.32)*</b>  | <b>1.82 (1.07-3.11)*</b>  |
| Missing value                    | 1.13 (0.49-2.63)          | n/a                       |
| <b>DONOR CHARACTERISTICS</b>     |                           |                           |
| <b>Age (years)</b>               | not in final model        | not in final model        |
| ≤45                              |                           |                           |
| 46-55                            |                           |                           |
| 56-60                            |                           |                           |
| 61-65                            |                           |                           |
| >65                              |                           |                           |
| <b>Sex: male</b>                 | not in final model        | not in final model        |
| <b>Blood group</b>               | <b>Overall*</b>           | <b>Overall*</b>           |
| A                                | 1.00                      | 1.00                      |
| AB                               | 0.99 (0.58-1.70)          | 1.20 (0.67-1.59)          |
| B                                | <b>0.37 (0.22-0.63)**</b> | <b>0.45 (0.27-0.75)**</b> |
| O                                | 1.06 (0.85-1.32)          | 1.06 (0.84-1.34)          |
| <b>BMI (kg.m<sup>-2</sup>)</b>   | not in final model        | not in final model        |
| ≤18.5                            |                           |                           |

|                        |                    |                    |
|------------------------|--------------------|--------------------|
| >18.5, ≤25.0           |                    |                    |
| >25.0, ≤30.0           |                    |                    |
| >30.0, ≤35.0           |                    |                    |
| >35.0, ≤40.0           |                    |                    |
| >40.0                  |                    |                    |
| Missing value          |                    |                    |
| <b>OTHER VARIABLES</b> |                    |                    |
| <b>Type of donor</b>   |                    |                    |
| DBD                    |                    |                    |
| DCD                    | not in final model | not in final model |
| Domino                 |                    |                    |
| Living                 |                    |                    |

**Table S14. Multivariable analyses by different methods to determine recipient and donor factors that significantly affect post-transplant survival in patients transplanted for NASH without HCC. \* $P < 0.05$ ; \*\* $P < 0.001$**
